# Supplementary material for: Effects of metal ion concentration on electrodeposited CuZnSn film and its application in kesterite Cu2ZnSnS4 solar cells
Source: Royal Society of Chemistry journal article supplement (doi:10.1039/c5ra09966h), 2015-01-01
Supplement: c5ra09966h1.pdf [file c5ra09966h1.pdf]

## Effects of metal ions concentration on electrodeposited CuZnSn film and its application in kesterite $\text{Cu}_2\text{ZnSnS}_4$ solar cells

Received 00th January 20xx,  
Accepted 00th January 20xx

Tubshin Hreid<sup>a</sup>, Jianjun Li<sup>b</sup>, Yi Zhang<sup>b</sup>, Henry J. Spratt<sup>c</sup>, Hongxia Wang<sup>a\*</sup>, Geoffrey Will<sup>a\*</sup>

DOI: 10.1039/x0xx00000x

www.rsc.org/

### Supplementary information

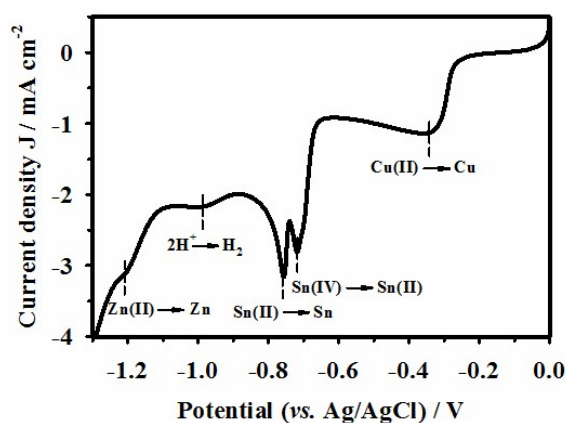

**Fig. S1.** linear voltammogram of the co-electrodeposition of copper tin and zinc (Mo/SLG substrate working electrode, Pt counter electrode and Ag/AgCl/Saturated KCl Reference electrode) immersed in 200mM  $\text{Na}_3\text{C}_6\text{H}_5\text{O}_7 \cdot 2\text{H}_2\text{O}$  and 20 mM  $\text{CuSO}_4 \cdot 5\text{H}_2\text{O}$ , 10 mM  $\text{ZnSO}_4 \cdot 7\text{H}_2\text{O}$  and 10mM  $\text{SnSO}_4$ . Scan rate: 10  $\text{mV s}^{-1}$ . The potential started at 0 V and was scanned in the negative direction.

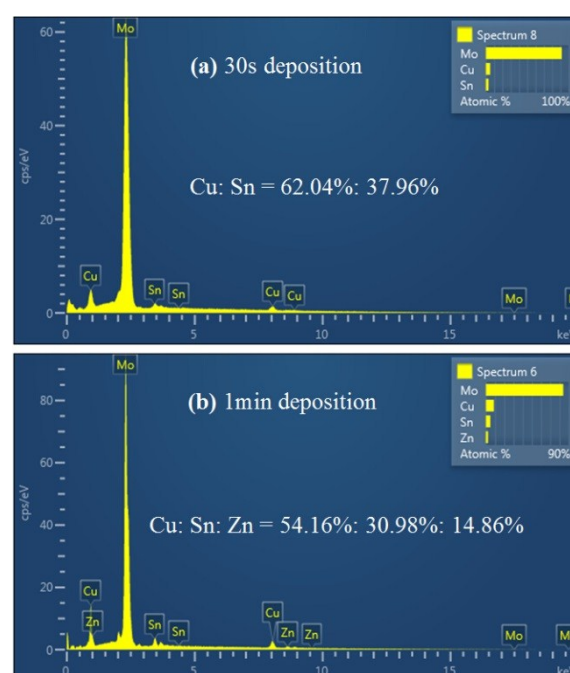

**Fig. S2.** EDS spectrum of the electrodeposited alloy film with different duration (a) 30s and (b) 1 min film, both deposited from the electrolyte solution containing 200mM  $\text{Na}_3\text{C}_6\text{H}_5\text{O}_7 \cdot 2\text{H}_2\text{O}$  and 20 mM  $\text{CuSO}_4 \cdot 5\text{H}_2\text{O}$ , 10 mM  $\text{ZnSO}_4 \cdot 7\text{H}_2\text{O}$  and 10mM  $\text{SnSO}_4$

<sup>a</sup> School of Chemistry, Physics and Mechanical Engineering, Science and Engineering Faculty, Queensland University of Technology, Brisbane, QLD, 4001, Australia

<sup>b</sup> Institute of Photoelectronic Thin Film Devices and Technology, Nankai University, Tianjin 300071, China

<sup>c</sup> Central Analytical Research Facility, Institute for Future Environments, Queensland University of Technology, Brisbane, QLD, 4001, Australia

\* Email: hx.wang@qut.edu.au; g.will@qut.edu.au

Electronic Supplementary Information (ESI) available: [details of any supplementary information available should be included here]. See DOI: 10.1039/x0xx00000x
